# Supplementary material
Source: PubMed Central journal article supplement (PMC8724318)
Supplement: 41401_2021_633_MOESM1_ESM.pdf [file 41401_2021_633_MOESM1_ESM.pdf]

# **PXR mediates mifepristone-induced hepatomegaly in mice**

## **(Supplementary Materials)**

Xin-peng Yao<sup>1, #</sup>, Ting-ying Jiao<sup>1, #</sup>, Yi-ming Jiang<sup>1</sup>, Shi-cheng Fan<sup>1</sup>, Ying-yuan Zhao<sup>1</sup>,  
Xiao Yang<sup>1</sup>, Yue Gao<sup>1</sup>, Yan-ying Zhou<sup>1</sup>, Pan-pan Chen<sup>1</sup>, Fei Li<sup>2</sup>, Min Huang<sup>1</sup>,  
Hui-chang Bi<sup>1,3\*</sup>.

---

\* **Correspondence:** Hui-chang Bi, Ph.D. School of Pharmaceutical Sciences, Sun Yat-sen University, 132# Waihuandong Road, Guangzhou University City, Guangzhou, 510006, P.R. China. Email: [bihchang@mail.sysu.edu.cn](mailto:bihchang@mail.sysu.edu.cn). Phone: +86-20-39943470, Fax: +86-20-39943000.

<sup>1</sup> Guangdong Provincial Key Laboratory of New Drug Design and Evaluation, School of Pharmaceutical Sciences, Sun Yat-sen University, Guangzhou University City, Guangzhou, 510006, China.

<sup>#</sup> These two authors contributed equally to the work.

<sup>2</sup> Kunming Institute of Botany, Chinese Academy of Sciences. Kunming, 650201, China.

<sup>3</sup> School of Pharmacy, Southern Medical University. Guangzhou, 510515, China.

## Supplemental Figures

### Supporting Figure-1

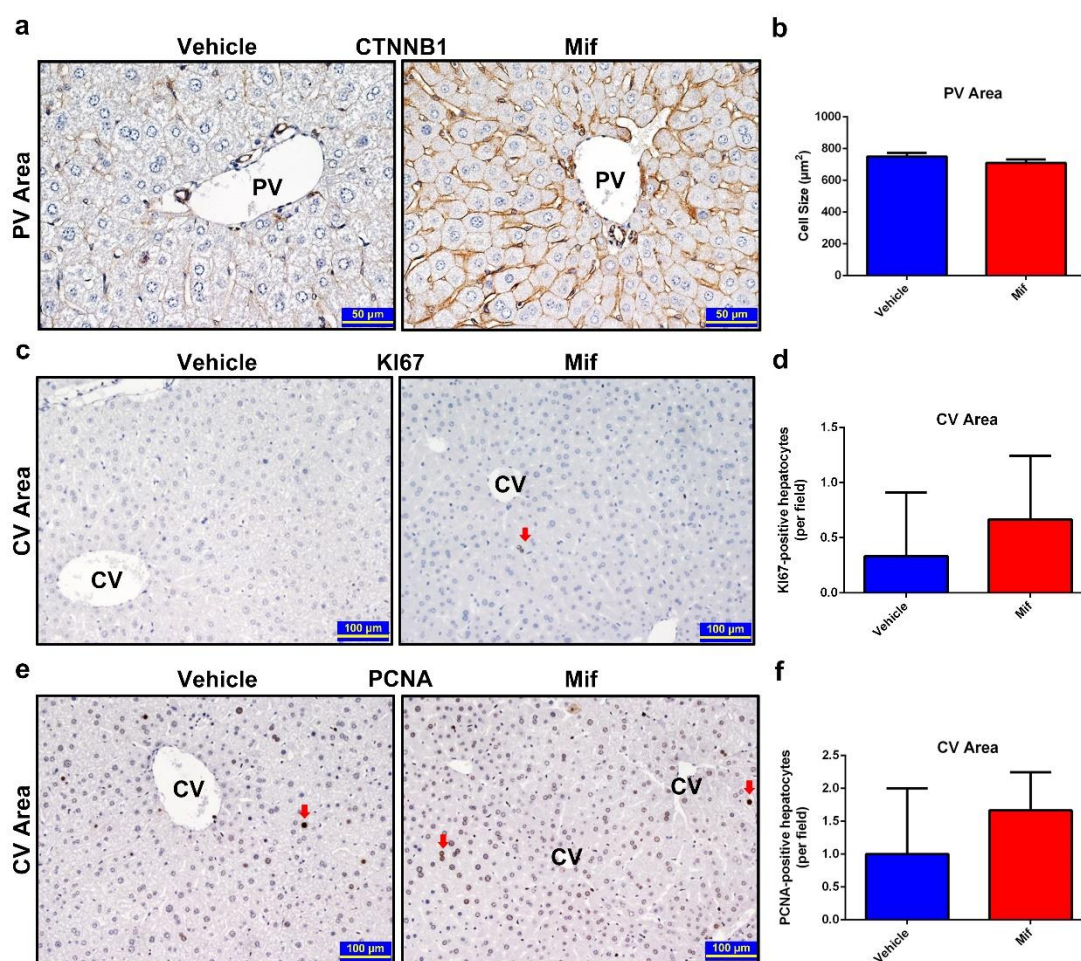

**Figure S1 Mif cannot induce hepatocyte enlargement around the PV area and hepatocyte proliferation around the CV area.**

(a) IHC staining of CTNNB1 of mice liver measuring hepatocyte size around the PV area of the vehicle- or Mif-treated group. (b) Quantification of the hepatocyte size around the PV area. (c) IHC staining of KI67 of liver sections around the CV area of the vehicle- or Mif-treated mice. (d) Quantification of KI67<sup>+</sup> hepatocytes around CV area. (e) IHC staining of PCNA of liver sections around the CV area of the vehicle- or Mif-treated mice. (f) Quantification of PCNA<sup>+</sup> hepatocytes around the CV area. The data are shown as mean  $\pm$  S.D. (n=3).

**Supporting Figure-2**

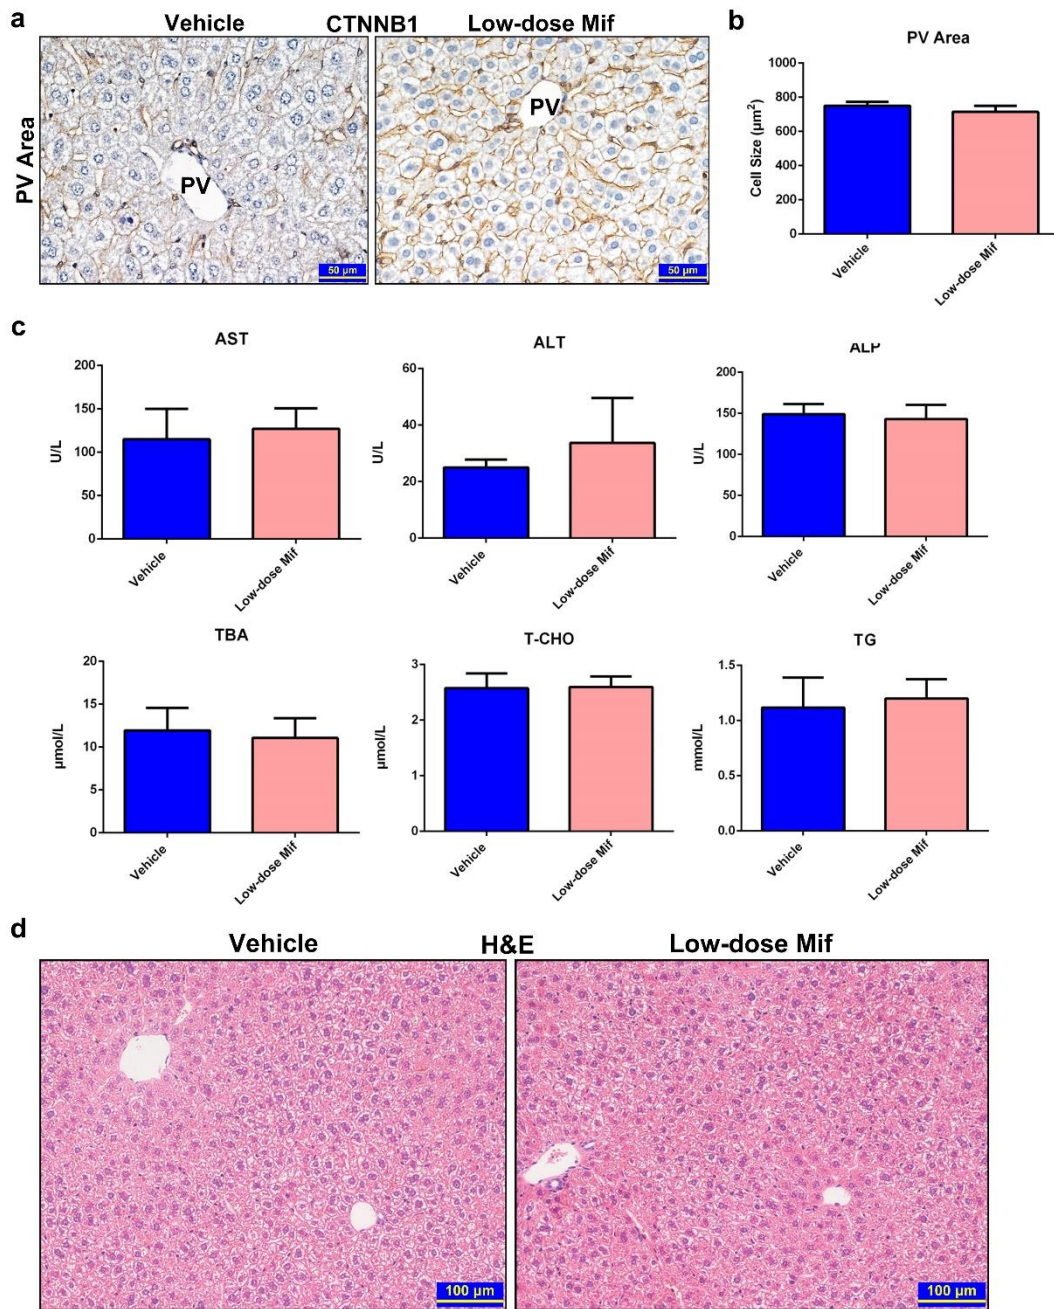

**Figure S2 Hepatocyte enlargement and liver injury were not observed after treated with low-dose Mif.**

(a) IHC staining of CTNNB1 of mice liver of the vehicle- or Mif-treated group. (b) Quantification of the hepatocyte size around PV area of mice liver in the vehicle- or Mif-treated group. (c) Biochemical indexes of serum samples including ALT, AST,

ALP, TBA, T-CHO and TG of the vehicle or Mif group. (d) H&E staining of liver sections of the vehicle group or Mif group.

### Supporting Figure-3

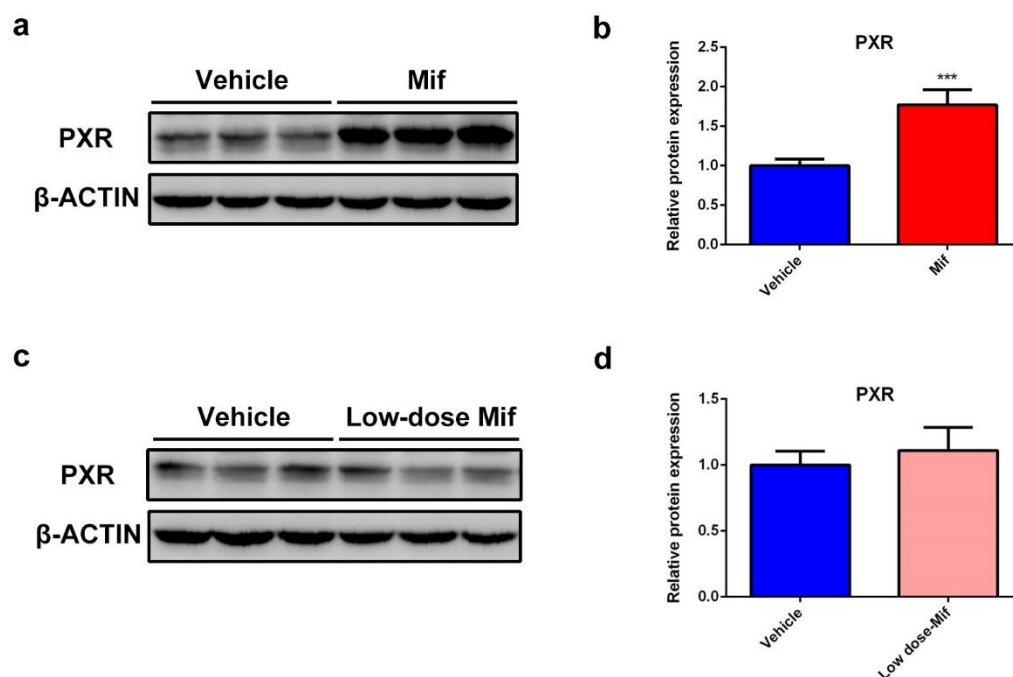

**Figure S3 Mif induces the protein expression of PXR in a dose-dependent manner**

(a) The protein expression levels of hepatic PXR in the vehicle or Mif group. (b) Quantification of PXR protein levels were normalized to the expression of  $\beta$ -ACTIN. (c) The protein expression levels of hepatic PXR in the vehicle or low-dose Mif group. (d) Quantification of PXR protein levels were normalized to the expression of  $\beta$ -ACTIN. The data are expressed as mean  $\pm$  S.D. \*\*\* $P < 0.001$  compared with the vehicle group (n = 3).

## Supporting Figure-4

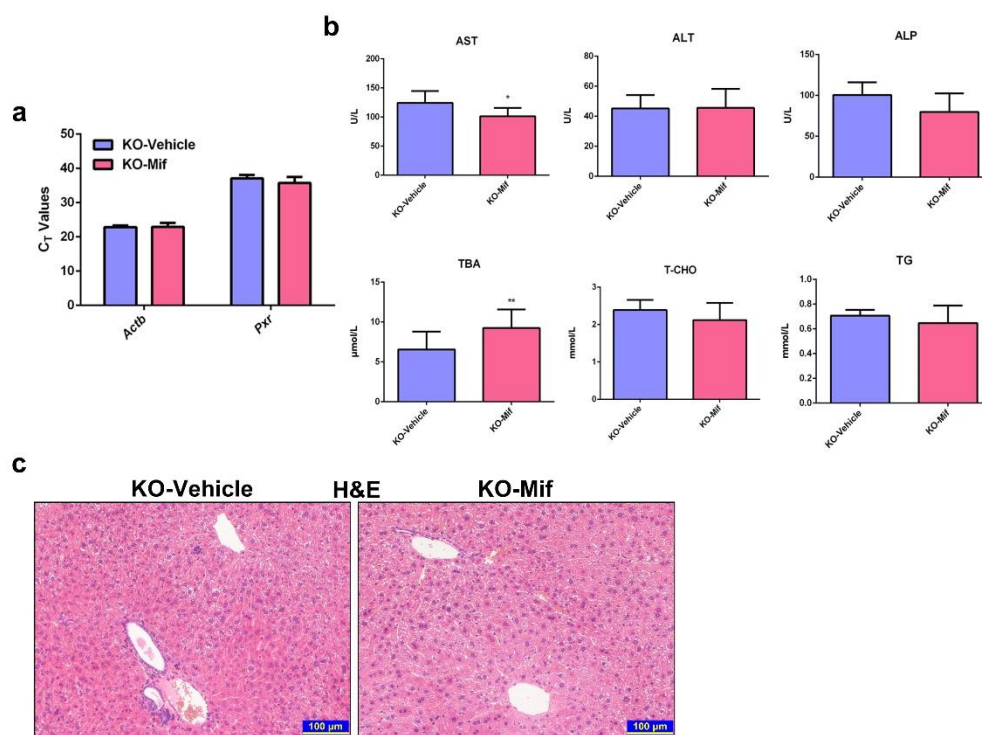

**Figure S4 Liver injury was not induced in *Pxr*-knockout mice after treated with high-dose Mif.**

(a)  $C_T$  values of qRT-PCR analysis in liver samples of *Pxr*-knockout mice treated with the vehicle or Mif. (b) Biochemical parameters of serum samples including ALT, AST, ALP, TBA, T-CHO and TG of KO-vehicle or KO-Mif group. (c) H&E staining of mice liver of the KO-vehicle group or KO-Mif group. These data are shown as mean  $\pm$  S.D. \* $P < 0.05$  and \*\* $P < 0.01$  compared with the vehicle group (n=4-6).

**Supporting Table-1 Sequences of primers for quantitative real-time PCR.**

| <b>Genes</b>                   | <b>Primers (5'-3') Forward</b> | <b>Primers (5'-3') Reverse</b> |
|--------------------------------|--------------------------------|--------------------------------|
| <i>Pxr</i>                     | GATGGAGGTCTTCAAATCTGCC         | GGCCCTTCTGAAAAACCCCT           |
| <i>Cyp3a11</i>                 | GGATGAGATCGATGAGGCTCTG         | CAGGTATTCCATCTCCATCACAGT       |
| <i>Cyp2b10</i>                 | TGCTGTCGTTGAGCCAACC            | CCACTAAACATTGGGCTTCCT          |
| <i>Ugt1a1</i>                  | GCTTCTTCCGTACCTTCTGTTG         | GCTGCTGAATAACTCCAAGCAT         |
| <i>Il-6</i>                    | TAGTCCTTCCTACCCCAATTTC         | TTGGTCCTTAGCCACTCCTTC          |
| <i>Il-10</i>                   | CTTACTGACTGGCATGAGGATCA        | GCAGCTCTAGGAGCATGTGG           |
| <i>Il-1<math>\beta</math></i>  | GAAATGCCACCTTTTGACAGTG         | TGGATGCTCTCATCAGGACAG          |
| <i>Tnf-<math>\alpha</math></i> | CCCTCACACTCAGATCATCTTCT        | GCTACGACGTGGGCTACAG            |
| <i>Actb</i>                    | GGCTGTATTCCCCTCCATCG           | CCAGTTGGTAACAATGCCATGT         |
